# Supplementary material
Source: PubMed Central journal article supplement (PMC2753678)

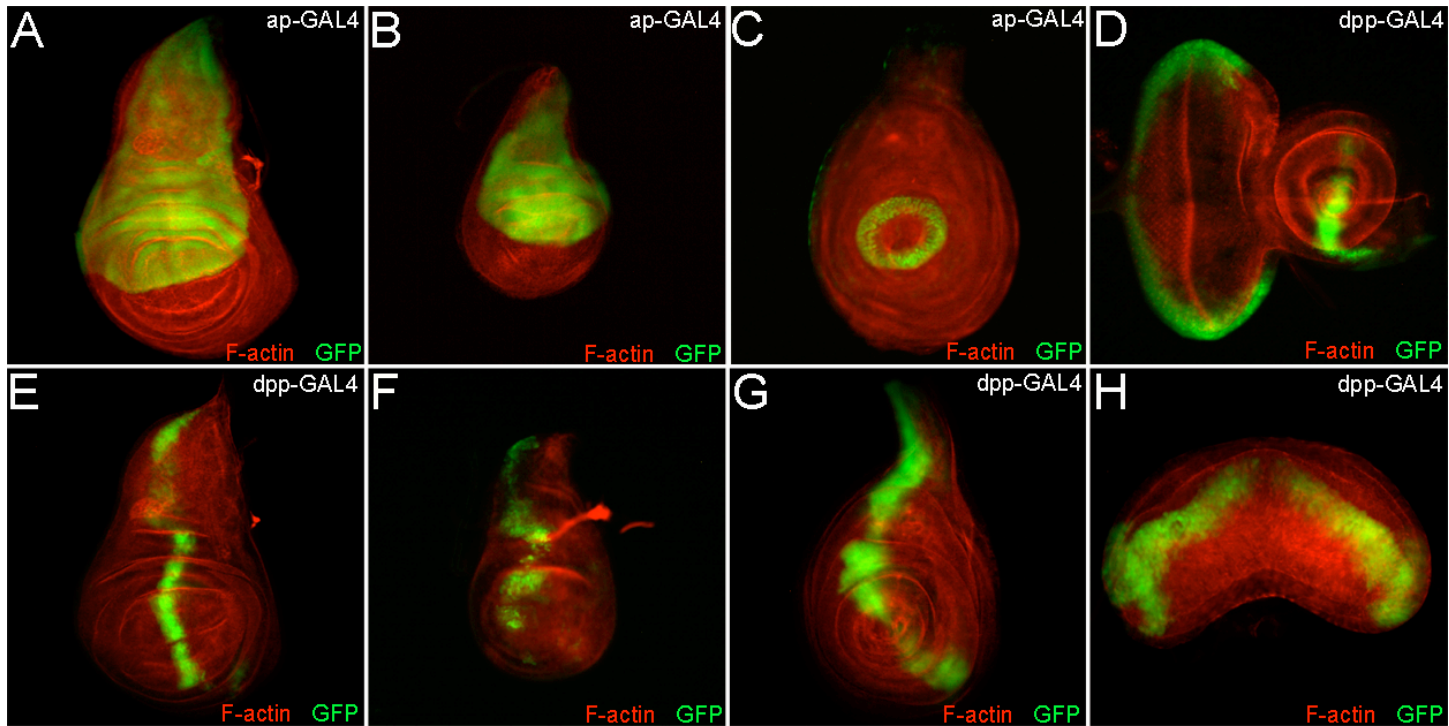

Supplemental Figure 1. Expression Pattern of ap-GAL4 and dpp-GAL4 drivers

Supplement: NIHMS126154-supplement-SI_figure_1.pdf [file NIHMS126154-supplement-SI_figure_1.pdf]
